# Supplementary material
Source: publisher figshare collection journal article supplement (https://sage.figshare.com/ndownloader/files/12957338)
Supplement: Supplementary file 1 [file 12957338]

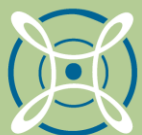

THE CENTER  
FOR MANAGING  
CHRONIC DISEASE

Putting People at the Center of Solutions

# Tracking Systems Change:

## Selected Examples of Systems and Policy Changes

September 2009

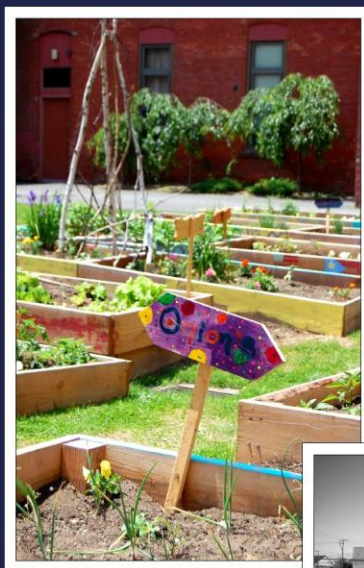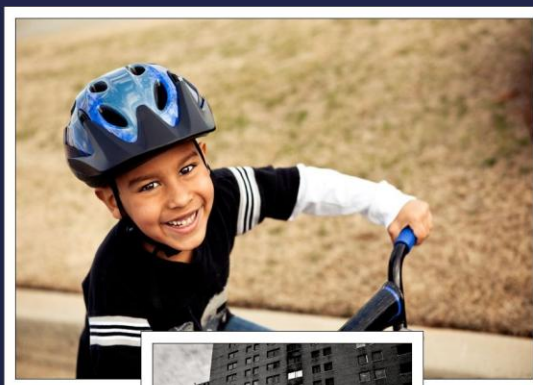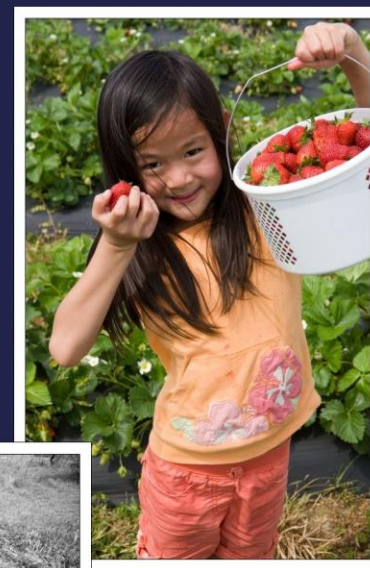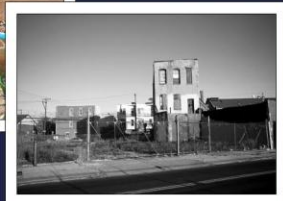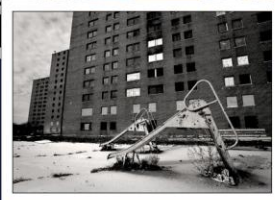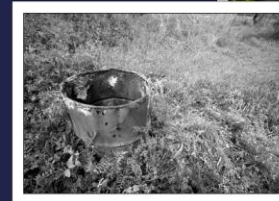

## Selected Examples of Systems and Policy Changes

This document comprises selected examples of possible targeted systems and policy changes that have been compiled from the following sources:

- *Promising Strategies for Creating Healthy Eating and Active Living Environments*, a document created for the Healthy Eating Active Living Convergence Partnership by the Prevention Institute
- *SHAPING THE CONTEXT OF HEALTH: A Review of Environmental and Policy Approaches in the Prevention of Chronic Diseases*, by Ross Brownson, Debra Haire-Joshu, and Douglas A. Luke
- Charting Growth Toward Good Food – draft indicators
- Preliminary work done by experts as part of the CDC Common Community Measures for Obesity Prevention project (COCOMO)
- Expert opinion in the area of food systems, the built environment, and physical activity
- Best practices from a number of sources including relevant systems and policy changes listed in the ENACT database, an initiative of the Strategic Alliance for Healthy Food and Activity Environments, part of the Prevention Institute
- Work being planned by W.K. Kellogg Foundation Food & Fitness collaboratives.
- UM developed indicators

The examples are provided to stimulate your thinking about potential changes a collaborative may seek to bring about, what success might look like if those changes are realized, and how one might measure the impact. Many people refer to these as indicators of change.

# TABLE OF CONTENTS

## Built Environment/Physical Activity

|                                                 |          |
|-------------------------------------------------|----------|
| <b>School System .....</b>                      | <b>3</b> |
| Use of School Facilities                        |          |
| Physical Activity in School                     |          |
| After-School Activities                         |          |
| Safe Routes to school                           |          |
| <b>Transportation System.....</b>               | <b>3</b> |
| Sidewalks                                       |          |
| Infrastructure Supporting Bicycling and Walking |          |
| Safety                                          |          |
| Connecting Trails and Bike Paths                |          |
| Crosswalks                                      |          |
| <b>Parks and Recreation.....</b>                | <b>4</b> |
| Development                                     |          |
| Access                                          |          |
| Transportation Subsidies                        |          |
| Safety                                          |          |
| Youth Preferences                               |          |
| <b>Other Institutional.....</b>                 | <b>5</b> |
| Child Care                                      |          |
| <b>Community Design/Land Use.....</b>           | <b>5</b> |
| Municipal, City, County or Tribal Board         |          |
| Comprehensive Land Use Plan                     |          |
| Active Living Staff                             |          |
| Mixed-Use Development Guidelines                |          |
| Flexible Public Housing Guidelines              |          |
| Smart Growth Strategies and Zoning              |          |
| Zoning Code Amendments                          |          |
| Point-of-Decision Prompts                       |          |

## Food Systems

|                                                           |          |
|-----------------------------------------------------------|----------|
| <b>Food Production.....</b>                               | <b>6</b> |
| Farming                                                   |          |
| Community Gardens                                         |          |
| <b>Food Processing.....</b>                               | <b>6</b> |
| Food Processing – General                                 |          |
| <b>Food Distribution.....</b>                             | <b>6</b> |
| Food Distribution – General                               |          |
| Farmers Markets                                           |          |
| Farm to School                                            |          |
| <b>Food Retailing.....</b>                                | <b>7</b> |
| Marketing at Food Outlets                                 |          |
| Electronic Marketing                                      |          |
| Transportation Subsidies                                  |          |
| Farmers Markets                                           |          |
| Supermarkets/Food Vendors                                 |          |
| Restaurants                                               |          |
| <b>Food Preparation.....</b>                              | <b>8</b> |
| Businesses/Organizations and other Community Institutions |          |
| Schools                                                   |          |
| Child Care Providers                                      |          |
| Public Funds                                              |          |
| Healthcare Food Service                                   |          |
| <b>Food Consumption.....</b>                              | <b>9</b> |
| Breastfeeding                                             |          |
| Breastfeeding at Workplace                                |          |
| Food Stamps                                               |          |

## Built Environment/Physical Activity

|                                                        | What is the change?                                                                                                                                                                                                                                                                                                      | What might success look like?                                                                                                                                                                                                       | How might we measure the impact?                                                                                                                                                                                                                                                               |
|--------------------------------------------------------|--------------------------------------------------------------------------------------------------------------------------------------------------------------------------------------------------------------------------------------------------------------------------------------------------------------------------|-------------------------------------------------------------------------------------------------------------------------------------------------------------------------------------------------------------------------------------|------------------------------------------------------------------------------------------------------------------------------------------------------------------------------------------------------------------------------------------------------------------------------------------------|
| <b>School System</b>                                   |                                                                                                                                                                                                                                                                                                                          |                                                                                                                                                                                                                                     |                                                                                                                                                                                                                                                                                                |
| <b>Use of School Facilities</b>                        | Use of public schools and facilities for physical activity by the public during non-school hours (joint-use agreements)                                                                                                                                                                                                  | Increase in the number of schools providing after-hours physical activity programs for the public and numbers of such programs they provide                                                                                         | Number of residents who participate in after-hours physical activity programs at schools                                                                                                                                                                                                       |
| <b>Physical Activity in Schools</b>                    | All students receive a minimum of 30 minutes of moderate to vigorous physical activity daily through physical education classes, recess, and before and/or after school programming (Could be achieved through adding new classes, lengthening existing classes, and/or increasing the intensity of activity in classes) | Increase in the number of schools requiring that all students receive a minimum of 30 minutes of moderate to physical activity daily through physical education classes, recess, and before and/or after school programming         | Number of students receiving a minimum of 30 minutes of moderate to vigorous physical activity daily through physical education classes, recess, and before and/or after school programming                                                                                                    |
| <b>After-School Activities</b>                         | Opportunities for students to engage in after-school recreational activity                                                                                                                                                                                                                                               | <ul style="list-style-type: none"> <li>• Increase in number of schools with after-school recreational activities</li> <li>• Increase in number of after-school activities</li> </ul>                                                | Number of students participating in after-school recreational activities                                                                                                                                                                                                                       |
| <b>Safe Routes to School</b>                           | Safe and walkable/bikeable routes to school                                                                                                                                                                                                                                                                              | <ul style="list-style-type: none"> <li>• Increase in number of schools with walkable/bikeable routes</li> <li>• Increase in number of safety guards at crosswalks for students walking or biking to school</li> </ul>               | Number of students walking or biking to school                                                                                                                                                                                                                                                 |
| <b>Transportation System</b>                           |                                                                                                                                                                                                                                                                                                                          |                                                                                                                                                                                                                                     |                                                                                                                                                                                                                                                                                                |
| <b>Sidewalks</b>                                       | Development and/or maintenance of sidewalks, sidewalk continuity, and/or “complete streets”                                                                                                                                                                                                                              | Increase in the number of sidewalks and “complete streets”                                                                                                                                                                          | Usage of sidewalks and streets for non-motorized transportation and/or recreation                                                                                                                                                                                                              |
| <b>Infrastructure Supporting Bicycling and Walking</b> | Proper infrastructure to support bicycling and walking                                                                                                                                                                                                                                                                   | <ul style="list-style-type: none"> <li>• Increased mileage of bike paths</li> <li>• Increased number of bike racks</li> <li>• Increased number/length of sidewalks</li> <li>• Increased number of benches, shade options</li> </ul> | Usage of pathways by bicyclists and walkers                                                                                                                                                                                                                                                    |
| <b>Safety</b>                                          | Safe use of sidewalks, neighborhoods, parks, open spaces, and parking areas at recreational facilities, including: <ul style="list-style-type: none"> <li>• Requiring lighting for these areas</li> <li>• Law enforcement patrols</li> <li>• Safe Routes to School program</li> </ul>                                    | <ul style="list-style-type: none"> <li>• Increased lighting</li> <li>• Increased law enforcement patrols</li> </ul>                                                                                                                 | <ul style="list-style-type: none"> <li>• Usage of sidewalks, neighborhoods, parks, open spaces, and parking areas at recreational facilities</li> <li>• Resident perception of safety of sidewalks, neighborhoods, parks, open spaces, and parking areas at recreational facilities</li> </ul> |

## Built Environment/Physical Activity

|                                         | What is the change?                                                                                                                                                                                                                                                                                                                                | What might success look like?                                                                                                                                                                                                                                                                                                                                                                       | How might we measure the impact?                                                                                                                                                                     |
|-----------------------------------------|----------------------------------------------------------------------------------------------------------------------------------------------------------------------------------------------------------------------------------------------------------------------------------------------------------------------------------------------------|-----------------------------------------------------------------------------------------------------------------------------------------------------------------------------------------------------------------------------------------------------------------------------------------------------------------------------------------------------------------------------------------------------|------------------------------------------------------------------------------------------------------------------------------------------------------------------------------------------------------|
| <b>Safety</b>                           | Safe access for all users of pathways, including pedestrians, bicyclists, motorists, and mass transit riders of all ages and abilities                                                                                                                                                                                                             | <ul style="list-style-type: none"> <li>Decreased number of safety incidents on and around pathways</li> <li>Increased usage of pathways</li> </ul>                                                                                                                                                                                                                                                  | Usage of pathways by pedestrians, bicyclists, motorists, and mass transit riders of all ages and abilities                                                                                           |
| <b>Connecting Trails and Bike Paths</b> | Connect roadways to complementary systems of trails and bike paths that provide safe places to walk and bike for children, the elderly, and the general public.                                                                                                                                                                                    | Increase in the number and/or length of connected trails and bike paths                                                                                                                                                                                                                                                                                                                             | Usage of trails and bike paths                                                                                                                                                                       |
| <b>Crosswalks</b>                       | Restricting motor vehicle speeds and requiring cars to yield to pedestrians at crosswalks in neighborhoods, near schools, and in shopping areas                                                                                                                                                                                                    | <ul style="list-style-type: none"> <li>Decrease in motor vehicle speeds in neighborhoods, near schools, and in shopping areas</li> <li>Increase in the number of crosswalks requiring cars to yield to pedestrians</li> </ul>                                                                                                                                                                       | <ul style="list-style-type: none"> <li>Pedestrian usage of crosswalks</li> <li>Resident perception of safety of crosswalks</li> </ul>                                                                |
| <b>Parks and Recreation</b>             |                                                                                                                                                                                                                                                                                                                                                    |                                                                                                                                                                                                                                                                                                                                                                                                     |                                                                                                                                                                                                      |
| <b>Development</b>                      | Development and/or maintenance of parks, open spaces, and recreational facilities, including: <ul style="list-style-type: none"> <li>Requiring construction and/or maintenance of parks, open spaces, and recreational facilities</li> <li>Incentives for private sector investments in parks, open spaces, and recreational facilities</li> </ul> | <ul style="list-style-type: none"> <li>Increased amount of funds dedicated to the development and/or maintenance of parks, open spaces, and recreational facilities</li> <li>Increased number and/or amount of private sector investments in parks, open spaces, and recreational facilities</li> <li>Increased number of parks, open spaces, and recreational facilities for public use</li> </ul> | Usage of parks, open spaces, and recreational facilities                                                                                                                                             |
| <b>Access</b>                           | <ul style="list-style-type: none"> <li>Increase access to recreational facilities via subsidized memberships and/or free programs</li> <li>Increase access to recreational facilities via locating facilities in underserved areas</li> <li>Increase minimum wage</li> </ul>                                                                       | <ul style="list-style-type: none"> <li>Increased number of facilities providing reduced-fee or free access to recreational facilities</li> <li>Increased number of recreational facilities in underserved areas</li> <li>Increased minimum wage</li> </ul>                                                                                                                                          | Usage of recreational facilities by low-income residents                                                                                                                                             |
| <b>Transportation Subsidies</b>         | Public transportation subsidies to recreational spaces or facilities                                                                                                                                                                                                                                                                               | Increased amount of transportation subsidies provided for transport to recreational spaces or facilities                                                                                                                                                                                                                                                                                            | Usage of parks, open spaces, and recreational facilities by low-income residents                                                                                                                     |
| <b>Safety</b>                           | Law enforcement or security patrols for parks, open spaces, and recreational facilities<br>Cleaning up parks, open spaces, and recreational facilities<br>Proper lighting in parks, open spaces, and recreational facilities<br>Ensuring outdoor facilities are free of wild dogs, animals, etc.                                                   | <ul style="list-style-type: none"> <li>Increase in the amount of funds dedicated to law enforcement or security patrols for parks, open spaces, and recreational facilities</li> <li>Increase in the amount of patrols of parks, open spaces, and recreational facilities</li> </ul>                                                                                                                | <ul style="list-style-type: none"> <li>Resident perception of safety of parks, open spaces, and recreational facilities</li> <li>Usage of parks, open spaces, and recreational facilities</li> </ul> |
| <b>Youth Preferences</b>                | Support the recreational preferences of youth, e.g. skateboard parks, basketball, dance                                                                                                                                                                                                                                                            | Increased number of recreational options geared toward preferences of youth                                                                                                                                                                                                                                                                                                                         | Usage of recreational facilities and spaces by youth                                                                                                                                                 |

## Built Environment/Physical Activity

|                                                | What is the change?                                                                                                                                                            | What might success look like?                                                                                                                                                                                                                                                            | How might we measure the impact?                                                                          |
|------------------------------------------------|--------------------------------------------------------------------------------------------------------------------------------------------------------------------------------|------------------------------------------------------------------------------------------------------------------------------------------------------------------------------------------------------------------------------------------------------------------------------------------|-----------------------------------------------------------------------------------------------------------|
| <b>Other Institutional</b>                     |                                                                                                                                                                                |                                                                                                                                                                                                                                                                                          |                                                                                                           |
| <b>Child Care</b>                              | Require licensed child care providers to provide at least 30 minutes of physical activity and play daily                                                                       | Increase in number of child care providers providing at least 30 minutes of physical activity and play daily                                                                                                                                                                             | Children participating in at least 30 minutes of physical activity and play daily at child care providers |
| <b>Community Design/Land Use</b>               |                                                                                                                                                                                |                                                                                                                                                                                                                                                                                          |                                                                                                           |
| <b>Municipal, City, County or Tribal Board</b> | A municipal, city, county or tribal board overseeing issues related to the built environment and physical activity                                                             | Increase in amount of funds dedicated to issues related to the built environment and physical activity                                                                                                                                                                                   |                                                                                                           |
| <b>Comprehensive Land Use Plan</b>             | A comprehensive land use plan (e.g. master plan, park and/or recreation plan, non-motorized transportation plan) that supports opportunities and options for physical activity | Existence of a comprehensive land use plan                                                                                                                                                                                                                                               |                                                                                                           |
| <b>Public Agency Active Living Staff</b>       | Dedicated public agency staff responsible for oversight of improvements to support active living environments (policies and programs supporting biking, walking, etc.)         | <ul style="list-style-type: none"> <li>• Increase in the number of public agency staff overseeing improvements to support active living environments (walking, biking, etc.)</li> <li>• Increase in amount of funds dedicated to issues related to active living environments</li> </ul> |                                                                                                           |
| <b>Mixed-Use Development Guidelines</b>        | Mixed-used community development guidelines, incorporating housing, retail, commercial uses, offices and restaurants                                                           | <ul style="list-style-type: none"> <li>• Existence of mixed-use development guidelines</li> <li>• Increased heterogeneity in developments, incorporating housing, retail, civic uses, commercial uses, offices, and restaurants</li> </ul>                                               |                                                                                                           |
| <b>Flexible Public Housing Guidelines</b>      | Flexible public housing guidelines regarding density, recreation and mixed-use                                                                                                 | Increase in the number of public housing developments incorporating recreation and mixed-use                                                                                                                                                                                             | Number of public housing developments incorporating recreation and mixed-use                              |
| <b>Smart Growth Strategies and Zoning</b>      | Smart growth strategies and zoning for new developments and revitalizing communities                                                                                           | Increase in number of new developments incorporating sidewalks, bike lanes, and recreational and/or open space                                                                                                                                                                           | Resident usage of sidewalks, bike lanes, and recreational and/or open space                               |
| <b>Zoning Code Amendments</b>                  | Allow public use of private vacant lots for community recreation and food production                                                                                           | Increase in land available for community recreation and food production                                                                                                                                                                                                                  | Square footage/acreage available for community recreation and food production                             |
| <b>Point-of-Decision Prompts</b>               | Placement of point-of-decision prompts by elevators and escalators (e.g. in bus stations, subways, malls) to encourage the use of stairs                                       | Increase in number of users opting to utilize stairs instead of elevators or escalators                                                                                                                                                                                                  | Usage of stairs                                                                                           |

## Food Systems

|                                    | What is the change?                                                                                                                                                                                                                                                                                                                                            | What might success look like?                                                                                                                                                                                                                                                                                                              | How might we measure the impact?                                                                                                                        |
|------------------------------------|----------------------------------------------------------------------------------------------------------------------------------------------------------------------------------------------------------------------------------------------------------------------------------------------------------------------------------------------------------------|--------------------------------------------------------------------------------------------------------------------------------------------------------------------------------------------------------------------------------------------------------------------------------------------------------------------------------------------|---------------------------------------------------------------------------------------------------------------------------------------------------------|
| <b>Food Production</b>             |                                                                                                                                                                                                                                                                                                                                                                |                                                                                                                                                                                                                                                                                                                                            |                                                                                                                                                         |
| <b>Farming</b>                     | Local production of affordable, healthy food <ul style="list-style-type: none"> <li>• Invest in new and existing farmers</li> <li>• Access to capital for small farms</li> <li>• Land acquisition for development of farming</li> <li>• Switch from commodity crops to non commodity crops (e.g. more fruits and vegetables for direct consumption)</li> </ul> | <ul style="list-style-type: none"> <li>• Increase in the number of local producers of affordable, healthy food</li> <li>• Increase in the amount of funds dedicated to supporting new and existing farmers</li> <li>• Increase in amount of farm land</li> <li>• Increase in farm land dedicated to growing non commodity crops</li> </ul> | Amount of affordable, healthy food grown locally                                                                                                        |
| <b>Community Gardens</b>           | Development and/or maintenance of community gardens                                                                                                                                                                                                                                                                                                            | <ul style="list-style-type: none"> <li>• Increase in the number of community gardens</li> <li>• Increase in the amount of funds dedicated to the development and/or maintenance of community gardens</li> <li>• Increase in the amount of land dedicated to community gardens</li> </ul>                                                   | Number of residents participating in community garden food production                                                                                   |
| <b>Food Processing</b>             |                                                                                                                                                                                                                                                                                                                                                                |                                                                                                                                                                                                                                                                                                                                            |                                                                                                                                                         |
| <b>Food Processing - General</b>   | Local processing of affordable, healthy food by relevant industries and businesses                                                                                                                                                                                                                                                                             | <ul style="list-style-type: none"> <li>• Increase in number of local food processors</li> <li>• Increase in amount of economic development funds directed toward the local processing of food</li> </ul>                                                                                                                                   | <ul style="list-style-type: none"> <li>• Amount of food processed locally</li> <li>• Amount of locally processed food purchased in community</li> </ul> |
| <b>Food Distribution</b>           |                                                                                                                                                                                                                                                                                                                                                                |                                                                                                                                                                                                                                                                                                                                            |                                                                                                                                                         |
| <b>Food Distribution - General</b> | Local distribution of affordable, healthy, locally grown food                                                                                                                                                                                                                                                                                                  | <ul style="list-style-type: none"> <li>• Increase in amount of economic development funds directed toward new or current businesses involved in the distribution of locally grown food</li> <li>• Increase in number of businesses involved in the distribution of locally grown food</li> </ul>                                           | Amount of locally grown food distributed by local businesses                                                                                            |
| <b>Farmers Markets</b>             | Development and/or maintenance of farmers markets                                                                                                                                                                                                                                                                                                              | <ul style="list-style-type: none"> <li>• Increase in resources (staffing, funds, infrastructure) focused on the development and/or maintenance of farmers markets</li> <li>• Increased number of farmers markets</li> </ul>                                                                                                                | Sales of affordable, healthy food at farmers' markets                                                                                                   |

## Food Systems

|                                                       | What is the change?                                                                                                                                                                                                                                                                                                                                                                                                                                                                                                                                                                                                                                                           | What might success look like?                                                                                                                                                                                                                                                                                                                                                                                                                                                                                                                                                                                                                                                                                                                         | How might we measure the impact?                                                                                                                                                                                                                                                             |
|-------------------------------------------------------|-------------------------------------------------------------------------------------------------------------------------------------------------------------------------------------------------------------------------------------------------------------------------------------------------------------------------------------------------------------------------------------------------------------------------------------------------------------------------------------------------------------------------------------------------------------------------------------------------------------------------------------------------------------------------------|-------------------------------------------------------------------------------------------------------------------------------------------------------------------------------------------------------------------------------------------------------------------------------------------------------------------------------------------------------------------------------------------------------------------------------------------------------------------------------------------------------------------------------------------------------------------------------------------------------------------------------------------------------------------------------------------------------------------------------------------------------|----------------------------------------------------------------------------------------------------------------------------------------------------------------------------------------------------------------------------------------------------------------------------------------------|
| <b>Food Retailing</b>                                 |                                                                                                                                                                                                                                                                                                                                                                                                                                                                                                                                                                                                                                                                               |                                                                                                                                                                                                                                                                                                                                                                                                                                                                                                                                                                                                                                                                                                                                                       |                                                                                                                                                                                                                                                                                              |
| <b>Marketing in Food Outlets</b>                      | Food marketing practices in food outlets that support healthy eating, including: <ul style="list-style-type: none"> <li>• Reducing point-of-sale marketing of energy dense, nutrient poor foods and beverages to children in grocery stores, corner stores, and restaurants</li> <li>• Requiring the placement of healthier food and beverage items at eye level, the ends of aisles, and prominent places</li> </ul>                                                                                                                                                                                                                                                         | Increase in number of grocery stores, corner stores, and restaurants that engage in marketing practices that support healthy eating                                                                                                                                                                                                                                                                                                                                                                                                                                                                                                                                                                                                                   | Sales of healthy food at grocery stores, corner stores, and restaurants                                                                                                                                                                                                                      |
| <b>Electronic Marketing</b>                           | Limit the marketing of energy dense, nutrient poor foods and beverages to children through television, other electronic media, food and beverage packages, toys, licensed characters, contests, or other marketing approaches.                                                                                                                                                                                                                                                                                                                                                                                                                                                | Decreased amount of marketing of energy dense, nutrient poor foods and beverages to children                                                                                                                                                                                                                                                                                                                                                                                                                                                                                                                                                                                                                                                          | Sales of energy dense, nutrient poor foods and beverages                                                                                                                                                                                                                                     |
| <b>Transportation Subsidies</b>                       | Public transportation subsidies to supermarkets and other food outlets that sell affordable, healthy food                                                                                                                                                                                                                                                                                                                                                                                                                                                                                                                                                                     | Increase in number of transportation subsidies provided for transport to supermarkets and other food outlets                                                                                                                                                                                                                                                                                                                                                                                                                                                                                                                                                                                                                                          | <ul style="list-style-type: none"> <li>• Demand for transportation subsidies by low-income residents</li> <li>• Sales of affordable, healthy food at supermarkets and other food outlets by low-income residents</li> </ul>                                                                  |
| <b>Full Service Grocery Stores/Other Food Vendors</b> | Increase retail sales of affordable, healthy, locally grown food, in underserved areas: <ul style="list-style-type: none"> <li>• Incentives to full service grocery stores and other food vendors to locate in underserved areas</li> <li>• Incentives to full service grocery stores and other food vendors to carry affordable, healthy, locally grown food</li> <li>• Incentives to full service grocery stores and other food vendors to provide price incentives to consumers for the consumption of healthy food and drink</li> <li>• Training for full service grocery stores and other food vendors regarding healthier – and locally grown – food choices</li> </ul> | <ul style="list-style-type: none"> <li>• Increase in amount of funds dedicated to supporting the retail sales of affordable, healthy, locally grown food</li> <li>• Increased number of full service grocery stores and other food vendors selling affordable, healthy, locally grown food</li> <li>• Increased number of full service grocery stores and other food vendors in underserved areas receiving training and/or incentives for carrying healthier food items</li> <li>• Increased number of full service grocery stores and other food vendors providing incentives to consumers for the consumption of healthy food and drink</li> <li>• Increased amount of shelf space dedicated to affordable, healthy, locally grown food</li> </ul> | <ul style="list-style-type: none"> <li>• Number of full-service grocery stores in underserved areas</li> <li>• Sales of affordable, healthy, locally grown food in underserved areas</li> <li>• Number of vendors of affordable, healthy, locally grown food in underserved areas</li> </ul> |

## Food Systems

|                                                                  | What is the change?                                                                                                                                                                                                                                                                                                                                                                                                                                                                                                                                                                    | What might success look like?                                                                                                                                                                                                                                                                             | How might we measure the impact?                                                                                                                       |
|------------------------------------------------------------------|----------------------------------------------------------------------------------------------------------------------------------------------------------------------------------------------------------------------------------------------------------------------------------------------------------------------------------------------------------------------------------------------------------------------------------------------------------------------------------------------------------------------------------------------------------------------------------------|-----------------------------------------------------------------------------------------------------------------------------------------------------------------------------------------------------------------------------------------------------------------------------------------------------------|--------------------------------------------------------------------------------------------------------------------------------------------------------|
| <b>Farmers Markets</b>                                           | Allow the use of EBT food stamps and WIC coupons at farmers markets                                                                                                                                                                                                                                                                                                                                                                                                                                                                                                                    | Increased number of farmers markets accepting EBT food stamps and WIC coupons as payment                                                                                                                                                                                                                  | Sales with EBT food stamps and WIC coupons at farmers markets                                                                                          |
|                                                                  | Extend open hours and days of farmers markets                                                                                                                                                                                                                                                                                                                                                                                                                                                                                                                                          | Farmers markets open longer during the day, and more days during the week                                                                                                                                                                                                                                 | Hours of farmers markets                                                                                                                               |
| <b>Restaurants</b>                                               | Support healthy eating in restaurants: <ul style="list-style-type: none"> <li>• Requiring restaurants to list calorie and nutritional information on menus</li> <li>• Encouraging restaurants to provide healthy foods and beverages by reformulating existing menu items, adding healthy menu items (e.g. fruits, vegetables, and whole grains), offering affordable and reasonably sized portions, providing healthier combinations for meals, and making healthier items the standard for children's meals</li> <li>• Promoting in-season sources for locally grown food</li> </ul> | <ul style="list-style-type: none"> <li>• Increased number of restaurants listing calorie and nutritional information on menus</li> <li>• Increased number of restaurants sourcing locally grown food</li> </ul>                                                                                           | <ul style="list-style-type: none"> <li>• Sales of healthy restaurant menu choices</li> <li>• Sales of locally grown restaurant menu choices</li> </ul> |
| <b>Food Preparation</b>                                          |                                                                                                                                                                                                                                                                                                                                                                                                                                                                                                                                                                                        |                                                                                                                                                                                                                                                                                                           |                                                                                                                                                        |
| <b>Businesses/Organizations and other Community Institutions</b> | Incentives for institutional procurement of locally grown food by businesses/organizations and other community institutions.                                                                                                                                                                                                                                                                                                                                                                                                                                                           | <ul style="list-style-type: none"> <li>• Increase in number of businesses/organizations and other community institutions sourcing healthy, locally-grown foods</li> <li>• Increase in number of businesses/organizations and other community institutions with established local food policies</li> </ul> | Amount of locally grown food distributed by businesses/organizations and other community institutions                                                  |
| <b>Schools</b>                                                   | Require food distributed or sold at schools to be appropriate portion sizes and meet good nutrition standards (e.g. more whole grains, legumes, fruits and vegetables, and water and less fat, sodium and sugars)                                                                                                                                                                                                                                                                                                                                                                      | Increase in number of schools distributing and selling healthy food of appropriate portion size                                                                                                                                                                                                           | Student consumption of healthy food, of appropriate portion size, at schools                                                                           |
|                                                                  | Limit/prohibit the placement of unhealthy foods in school vending machines and cafeterias                                                                                                                                                                                                                                                                                                                                                                                                                                                                                              | Increase in number of schools limiting/prohibiting the placement of unhealthy foods in school vending machines and cafeterias                                                                                                                                                                             | Student consumption of healthy school food                                                                                                             |

## Food Systems

|                                   | What is the change?                                                                                                                                                                                                                                                       | What might success look like?                                                                                                                                                                                                                                                                                     | How might we measure the impact?                                                                                   |
|-----------------------------------|---------------------------------------------------------------------------------------------------------------------------------------------------------------------------------------------------------------------------------------------------------------------------|-------------------------------------------------------------------------------------------------------------------------------------------------------------------------------------------------------------------------------------------------------------------------------------------------------------------|--------------------------------------------------------------------------------------------------------------------|
| <b>Schools Continued</b>          | Free healthy snacks in all schools                                                                                                                                                                                                                                        | Increased number of schools providing free healthy snacks to students during the school day                                                                                                                                                                                                                       | Student consumption of healthy foods at schools                                                                    |
|                                   | Allow for geographic preferences of local food sources in schools                                                                                                                                                                                                         | Increased number of schools sourcing locally grown, healthy foods                                                                                                                                                                                                                                                 | Student consumption of locally grown, healthy foods in schools                                                     |
|                                   | Support healthy school food environments: <ul style="list-style-type: none"> <li>• Prohibiting the use of foods as a reward or punishment</li> <li>• Limiting energy dense, nutrient poor foods at school celebrations</li> <li>• Offering only healthy snacks</li> </ul> | <ul style="list-style-type: none"> <li>• Increased number of schools prohibiting the use of foods as reward or punishment</li> <li>• Increased number of schools limiting energy dense, nutrient poor foods at school celebrations</li> <li>• Increased number of schools offering only healthy snacks</li> </ul> | Student consumption of healthy foods at schools                                                                    |
|                                   | Development of a School Wellness Policy                                                                                                                                                                                                                                   | (Variable, based upon content of Wellness Policy)                                                                                                                                                                                                                                                                 | (Variable, based upon content of Wellness Policy)                                                                  |
| <b>Child Care Providers</b>       | Require licensed child care providers to provide healthy snacks and meals of appropriate portion size                                                                                                                                                                     | Increase in number of child care providers providing healthy snacks and meals of appropriate portion size                                                                                                                                                                                                         | Consumption of healthy snacks and meals of appropriate portion size by children under care of child care providers |
|                                   | Incentives for institutional procurement of locally grown, healthy food by child care providers                                                                                                                                                                           | Increase in number of child care providers sourcing locally grown, healthy food                                                                                                                                                                                                                                   | Consumption of locally grown, healthy food by children under care of child care providers                          |
| <b>Healthcare Food Service</b>    | Supporting geographic preferences to procure locally grown foods for healthcare food service                                                                                                                                                                              | Increase in number of healthcare food service providers sourcing locally grown food                                                                                                                                                                                                                               | Consumption of locally grown foods served through healthcare food service providers                                |
| <b>Food Consumption</b>           |                                                                                                                                                                                                                                                                           |                                                                                                                                                                                                                                                                                                                   |                                                                                                                    |
| <b>Breastfeeding</b>              | Successful initiation and continuation of breastfeeding in hospitals and outpatient medical facilities (including physician practices, prenatal services, and community clinics)                                                                                          | Increased number of hospitals and outpatient medical facilities supporting successful initiation and continuation of breastfeeding                                                                                                                                                                                | Number of women who initiate and continue breastfeeding                                                            |
| <b>Breastfeeding at Workplace</b> | Allow breastfeeding women sufficient break time to pump, private space for expression of breast milk, and space to store breast milk                                                                                                                                      | Number of organizations with policies that allow breastfeeding women sufficient time to pump, private space for expression of breast milk, and space to store breast milk                                                                                                                                         | Number of women who pump and store breast milk at work                                                             |
| <b>Food Stamps</b>                | Increase the efficiency in food stamp delivery and increasing food stamp benefits levels to help more people purchase healthy foods                                                                                                                                       | Increase in the food stamp benefit level                                                                                                                                                                                                                                                                          | Sales of healthy foods through food stamps                                                                         |
